# Supplementary material for: Concentrating Solar Power Technologies: A Bibliometric Study of Past, Present and Future Trends in Concentrating Solar Power Research
Source: Frontiers journal article supplement (doi:10.3389/fmech.2021.682592), 2021-06-18
Supplement: Data_Sheet_1.pdf [file Data_Sheet_1.pdf]

**Table S1. Country increment of parabolic trough field publications compared to the accumulated from previous year.**

| <b>Country</b>   | <b>2010</b> | <b>2011</b> | <b>2012</b> | <b>2013</b> | <b>2014</b> | <b>2015</b> | <b>2016</b> | <b>2017</b> | <b>2018</b> | <b>2019</b> |
|------------------|-------------|-------------|-------------|-------------|-------------|-------------|-------------|-------------|-------------|-------------|
| <b>China</b>     | 69.6%       | 41.0%       | 40.0%       | 29.9%       | 39.0%       | 38.1%       | 26.6%       | 28.8%       | 17.3%       | 18.3%       |
| <b>Spain</b>     | 16.7%       | 19.0%       | 22.7%       | 28.3%       | 39.8%       | 18.8%       | 24.5%       | 21.7%       | 18.5%       | 7.1%        |
| <b>USA</b>       | 29.0%       | 18.8%       | 30.5%       | 14.5%       | 26.8%       | 7.8%        | 13.4%       | 10.5%       | 12.3%       | 10.3%       |
| <b>India</b>     | 9.1%        | 16.7%       | 57.1%       | 86.4%       | 36.6%       | 37.5%       | 41.6%       | 27.5%       | 45.3%       | 16.3%       |
| <b>Germany</b>   | 12.9%       | 7.6%        | 18.8%       | 6.9%        | 26.9%       | 16.1%       | 14.5%       | 12.1%       | 10.3%       | 4.0%        |
| <b>Italy</b>     | 40.0%       | 42.9%       | 70.0%       | 32.4%       | 53.3%       | 33.3%       | 26.1%       | 20.7%       | 16.4%       | 7.4%        |
| <b>Iran</b>      | 75.0%       | 0.0%        | 14.3%       | 37.5%       | 54.5%       | 41.2%       | 45.8%       | 62.9%       | 50.9%       | 47.7%       |
| <b>Australia</b> | 7.7%        | 7.1%        | 13.3%       | 47.1%       | 32.0%       | 27.3%       | 28.6%       | 20.4%       | 10.8%       | 12.5%       |
| <b>Mexico</b>    | 6.7%        | 12.5%       | 11.1%       | 10.0%       | 72.7%       | 10.5%       | 26.2%       | 20.8%       | 17.2%       | 8.0%        |
| <b>Greece</b>    | 33.3%       | 0.0%        | 0.0%        | 100.0%      | 12.5%       | 11.1%       | 110.0%      | 81.0%       | 57.9%       | 21.7%       |

**Table S2. Country/region increment of solar tower publications compared to the accumulated from previous year.**

| <b>Country</b>        | <b>2010</b> | <b>2011</b> | <b>2012</b> | <b>2013</b> | <b>2014</b> | <b>2015</b> | <b>2016</b> | <b>2017</b> | <b>2018</b> | <b>2019</b> |
|-----------------------|-------------|-------------|-------------|-------------|-------------|-------------|-------------|-------------|-------------|-------------|
| <b>USA</b>            | 19.7%       | 13.2%       | 33.0%       | 8.8%        | 33.6%       | 11.6%       | 18.9%       | 9.1%        | 9.7%        | 7.9%        |
| <b>China</b>          | 28.9%       | 24.5%       | 32.8%       | 23.5%       | 23.0%       | 15.4%       | 20.4%       | 20.5%       | 23.3%       | 18.5%       |
| <b>Spain</b>          | 18.8%       | 13.2%       | 11.6%       | 14.6%       | 56.4%       | 32.6%       | 25.4%       | 31.5%       | 26.1%       | 13.1%       |
| <b>Germany</b>        | 18.6%       | 21.6%       | 14.5%       | 5.6%        | 32.0%       | 19.2%       | 26.3%       | 19.5%       | 12.9%       | 6.0%        |
| <b>Australia</b>      | 0.0%        | 7.7%        | 14.3%       | 31.3%       | 47.6%       | 48.4%       | 32.6%       | 24.6%       | 22.4%       | 16.1%       |
| <b>France</b>         | 26.7%       | 10.5%       | 19.0%       | 24.0%       | 38.7%       | 25.6%       | 27.8%       | 30.4%       | 8.9%        | 6.1%        |
| <b>Italy</b>          | 0.0%        | 66.7%       | 40.0%       | 38.1%       | 27.6%       | 13.5%       | 28.6%       | 27.8%       | 30.4%       | 10.0%       |
| <b>India</b>          | 14.3%       | 12.5%       | 11.1%       | 50.0%       | 40.0%       | 52.4%       | 31.3%       | 11.9%       | 21.3%       | 10.5%       |
| <b>Canada</b>         | 5.3%        | 10.0%       | 9.1%        | 8.3%        | 26.9%       | 12.1%       | 8.1%        | 12.5%       | 17.8%       | 13.2%       |
| <b>United Kingdom</b> | 150.0%      | 20.0%       | 33.3%       | 37.5%       | 18.2%       | 46.2%       | 15.8%       | 18.2%       | 23.1%       | 28.1%       |

**Table S3. Country/region increment of Stirling dish publications compared to the accumulated from previous year.**

| <b>Country</b>        | <b>2010</b> | <b>2011</b> | <b>2012</b> | <b>2013</b> | <b>2014</b> | <b>2015</b> | <b>2016</b> | <b>2017</b> | <b>2018</b> | <b>2019</b> |
|-----------------------|-------------|-------------|-------------|-------------|-------------|-------------|-------------|-------------|-------------|-------------|
| <b>China</b>          | 80.0%       | 33.3%       | 41.7%       | 29.4%       | 27.3%       | 17.9%       | 27.3%       | 28.6%       | 18.5%       | 12.5%       |
| <b>USA</b>            | 5.9%        | 38.9%       | 52.0%       | 10.5%       | 19.0%       | 10.0%       | 12.7%       | 11.3%       | 5.8%        | 5.5%        |
| <b>India</b>          | -           | -           | 0.0%        | -           | 50.0%       | 22.2%       | 72.7%       | 57.9%       | 43.3%       | 30.2%       |
| <b>Iran</b>           | -           | -           | -           | -           | 40.0%       | 71.4%       | 66.7%       | 35.0%       | 37.0%       | 10.8%       |
| <b>Italy</b>          | 0.0%        | 0.0%        | -           | 50.0%       | -           | 57.1%       | 9.1%        | 75.0%       | 9.5%        | 30.4%       |
| <b>Spain</b>          | 0.0%        | 14.3%       | 50.0%       | 8.3%        | 30.8%       | 11.8%       | 10.5%       | 19.0%       | 8.0%        | 3.7%        |
| <b>United Kingdom</b> | 100.0%      | 0.0%        | 0.0%        | 0.0%        | 25.0%       | 60.0%       | 62.5%       | 15.4%       | 26.7%       | 15.8%       |
| <b>Australia</b>      | 0.0%        | 66.7%       | 40.0%       | 42.9%       | 0.0%        | 10.0%       | 9.1%        | 16.7%       | 7.1%        | 26.7%       |
| <b>Turkey</b>         | 0.0%        | 0.0%        | 0.0%        | 66.7%       | 0.0%        | 0.0%        | 60.0%       | 62.5%       | 23.1%       | 18.8%       |
| <b>France</b>         | 0.0%        | 0.0%        | 0.0%        | 75.0%       | 14.3%       | 12.5%       | 11.1%       | 30.0%       | 15.4%       | 20.0%       |

**Table S4. Country/region increment of Fresnel publications compared to the accumulated from previous year.**

| <b>Country</b>        | <b>2010</b> | <b>2011</b> | <b>2012</b> | <b>2013</b> | <b>2014</b> | <b>2015</b> | <b>2016</b> | <b>2017</b> | <b>2018</b> | <b>2019</b> |
|-----------------------|-------------|-------------|-------------|-------------|-------------|-------------|-------------|-------------|-------------|-------------|
| <b>Spain</b>          | 28.6%       | 33.3%       | 16.7%       | 57.1%       | 54.5%       | 26.5%       | 25.6%       | 29.6%       | 20.0%       | 9.5%        |
| <b>India</b>          | -           | -           | -           | 83.3%       | 72.7%       | 47.4%       | 32.1%       | 13.5%       | 28.6%       | 16.7%       |
| <b>China</b>          | 50.0%       | -           | 50.0%       | 66.7%       | 26.7%       | 31.6%       | 16.0%       | 41.4%       | 19.5%       | 14.3%       |
| <b>Italy</b>          | -           | -           | -           | 33.3%       | -           | 72.7%       | 57.9%       | 23.3%       | 13.5%       | 16.7%       |
| <b>Germany</b>        | -           | -           | -           | 37.5%       | 90.9%       | 42.9%       | 16.7%       | 5.7%        | 8.1%        | 5.0%        |
| <b>USA</b>            | 0.0%        | 75.0%       | -           | 13.3%       | 29.4%       | 13.6%       | 20.0%       | 10.0%       | 18.2%       | 5.1%        |
| <b>France</b>         | 100.0%      | 16.7%       | 0.0%        | 14.3%       | 75.0%       | 35.7%       | 15.8%       | 9.1%        | 12.5%       | 3.7%        |
| <b>Australia</b>      | 0.0%        | 0.0%        | 37.5%       | 27.3%       | 21.4%       | 11.8%       | 15.8%       | 0.0%        | 13.6%       | 4.0%        |
| <b>Portugal</b>       | -           | -           | 0.0%        | -           | 71.4%       | 16.7%       | 42.9%       | 15.0%       | 8.7%        | 0.0%        |
| <b>United Kingdom</b> | -           | -           | -           | 28.6%       | 22.2%       | 0.0%        | 27.3%       | 7.1%        | 20.0%       | 16.7%       |
